# Supplementary material for: A Tale of Two Hyper-diversities: Diversification dynamics of the two largest families of lichenized fungi
Source: PubMed Central journal article supplement (PMC4421861; doi:10.1038/srep10028), 2015-05-06
Supplement: srep10028-s1.pdf [file srep10028-s1.pdf]

## Supplementary Materials

### **A Tale of Two Hyper-diversities: Diversification dynamics of the two largest families of lichenized fungi**

Ekaphan Kraichak<sup>1,2</sup>, Pradeep K. Divakar<sup>3</sup>, Ana Crespo<sup>3</sup>, Steven D. Leavitt<sup>1</sup>, Matthew P. Nelsen<sup>1,4</sup>, Robert Lücking<sup>1</sup>, H. Thorsten Lumbsch<sup>1</sup>

<sup>1</sup> Science and Education, The Field Museum, 1400 S Lake Shore Drive, Chicago, IL 60605 USA

<sup>2</sup> Department of Botany, Faculty of Science, Kasetsart University, Bangkok, 10900 Thailand

<sup>3</sup> Departamento de Biología Vegetal II, Facultad de Farmacia, Universidad Complutense de Madrid, Madrid 28040, Spain

<sup>4</sup> Department of Geological and Environmental Sciences, Stanford University, Stanford, CA 94305



Supplementary Figure 2: Maximum Credibility Clade Tree of lichen-forming fungi family Parmeliaceae. See node names in supplementary table 2.

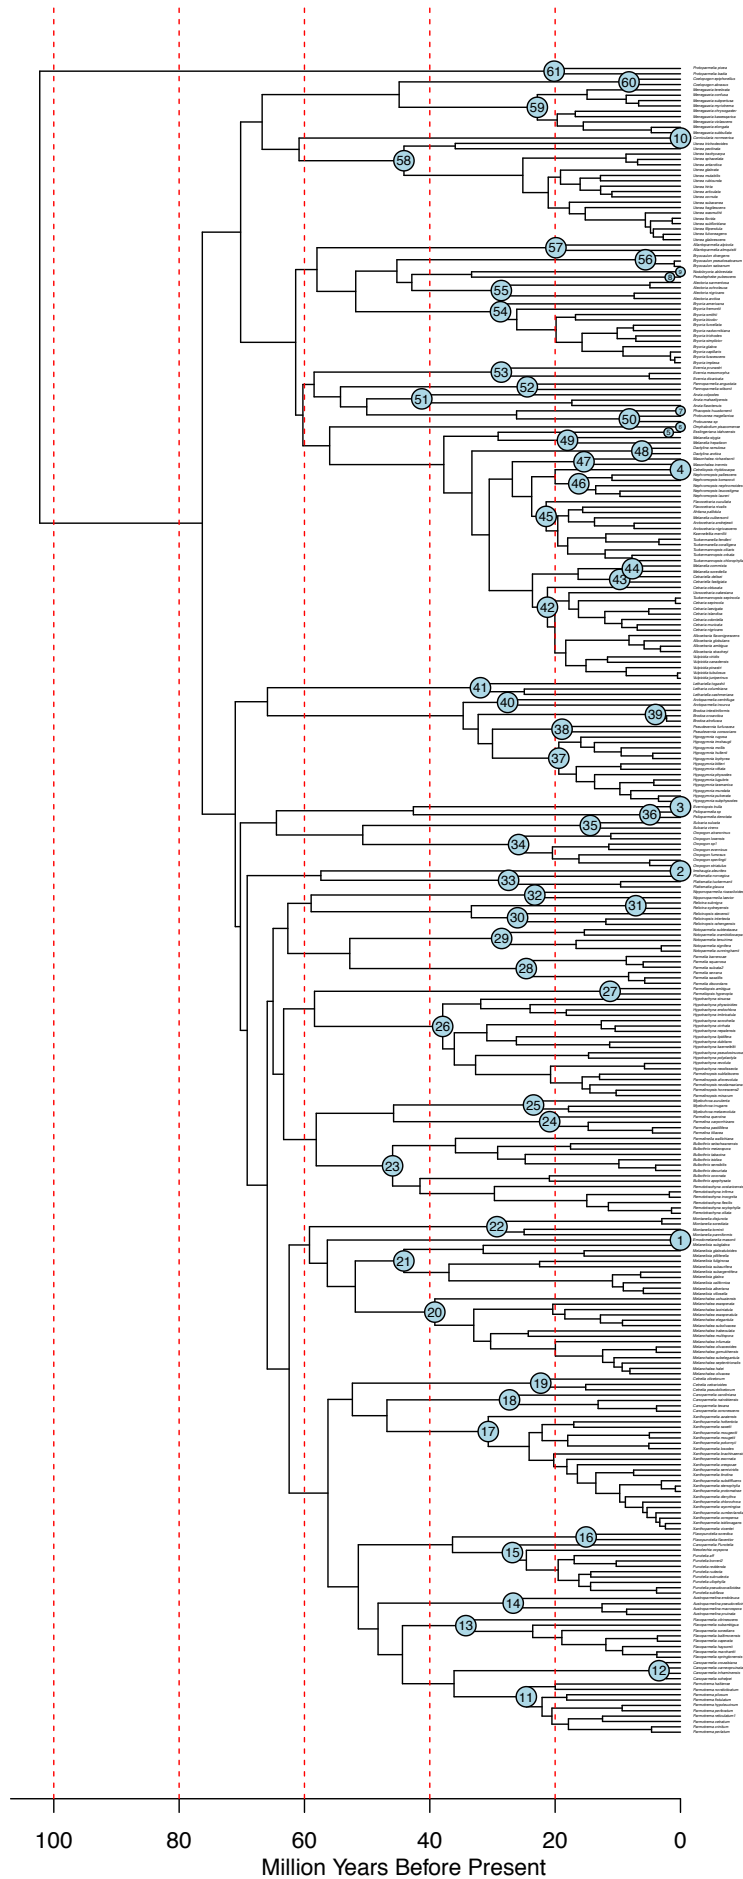

**Supplementary Table 1:** Clades and their species richness in Graphidaceae

| <b>clade</b>      | <b>Node Number</b> | <b>Total Number of Taxa</b> | <b>Number of sampled taxa</b> |
|-------------------|--------------------|-----------------------------|-------------------------------|
| Glaucotrema       | 1                  | 6                           | 1                             |
| Ocellularia       | 2                  | 317                         | 46                            |
| Rhabdodiscus      | 3                  | 43                          | 4                             |
| Myriotrema        | 4                  | 126                         | 15                            |
| Diploschisteae    | 5                  | 39                          | 11                            |
| Wirthiotremateae  | 6                  | 83                          | 20                            |
| Phaeographis      | 7                  | 300                         | 21                            |
| Diorygma          | 8                  | 90                          | 5                             |
| Glyphis           | 9                  | 13                          | 3                             |
| Allographa        | 10                 | 237                         | 6                             |
| Graphis           | 11                 | 314                         | 10                            |
| Astrochapsa       | 12                 | 22                          | 6                             |
| Pseudochapsa      | 13                 | 22                          | 4                             |
| Leucodecton       | 14                 | 28                          | 6                             |
| Chapsa            | 15                 | 58                          | 12                            |
| Thelotrema        | 16                 | 107                         | 18                            |
| Chroodiscus       | 17                 | 14                          | 5                             |
| Acanthotheceiae   | 18                 | 63                          | 4                             |
| Leptotremateae    | 19                 | 5                           | 2                             |
| Redonographoideae | 20                 | 7                           | 2                             |
| Fissurinoideae    | 21                 | 185                         | 18                            |

**Supplementary Table 2:** Clades and their species richness in Parmeliaceae

| <b>clade</b>    | <b>Node Number</b> | <b>Total Number of Taxa</b> | <b>Number of sampled taxa</b> |
|-----------------|--------------------|-----------------------------|-------------------------------|
| Emodomelanelia  | 1                  | 1                           | 1                             |
| Imshaugia       | 2                  | 7                           | 1                             |
| Everniopsis     | 3                  | 1                           | 1                             |
| Cetrelia        | 4                  | 7                           | 1                             |
| Esslingeriana   | 5                  | 1                           | 1                             |
| Omphalodium     | 6                  | 4                           | 1                             |
| Phacopsis       | 7                  | 35                          | 1                             |
| Pseudophebe     | 8                  | 2                           | 1                             |
| Nodobryoria     | 9                  | 3                           | 1                             |
| Conicularia     | 10                 | 1                           | 1                             |
| Parmotrema      | 11                 | 300                         | 10                            |
| Canoparmelia1   | 12                 | 20                          | 4                             |
| Flavoparmelia   | 13                 | 32                          | 8                             |
| Austroparmelina | 14                 | 13                          | 4                             |
| Punctelia       | 15                 | 49                          | 10                            |
| Flavopunctelia  | 16                 | 5                           | 2                             |
| Xanthoparmelia  | 17                 | 820                         | 22                            |
| Canoparmelia2   | 18                 | 20                          | 4                             |
| Cetrelia        | 19                 | 15                          | 3                             |
| Melanohalea     | 20                 | 22                          | 15                            |
| Melanelixia     | 21                 | 15                          | 10                            |
| Montanelia      | 22                 | 9                           | 4                             |
| Bulbothrix      | 23                 | 73                          | 15                            |
| Parmelina       | 24                 | 9                           | 4                             |
| Myelochroa      | 25                 | 30                          | 3                             |
| Hypotrachyna    | 26                 | 213                         | 19                            |
| Parmeliopsis    | 27                 | 3                           | 2                             |
| Parmelia        | 28                 | 41                          | 6                             |
| Notoparmelia    | 29                 | 16                          | 5                             |
| Relicinopsis    | 30                 | 5                           | 3                             |
| Relicina        | 31                 | 54                          | 2                             |
| Nipponoparmelia | 32                 | 4                           | 2                             |
| Platismatia     | 33                 | 11                          | 3                             |
| Oropogon        | 34                 | 40                          | 7                             |
| Sulcaria        | 35                 | 4                           | 2                             |
| Psiloparmelia   | 36                 | 13                          | 2                             |
| Hypogymnia      | 37                 | 90                          | 13                            |
| Pseudoevernia   | 38                 | 4                           | 2                             |
| Brodoa          | 39                 | 3                           | 3                             |
| Arctoparmelia   | 40                 | 5                           | 2                             |
| Letheria        | 41                 | 17                          | 3                             |
| Cetraria        | 42                 | 32                          | 18                            |
| Cetrariella     | 43                 | 4                           | 2                             |
| Melanelia2      | 44                 | 6                           | 2                             |
| Tuckermaniopsis | 45                 | 38                          | 12                            |
| Nephromopsis    | 46                 | 21                          | 5                             |

| <b>clade</b>    | <b>Node Number</b> | <b>Total Number of Taxa</b> | <b>Number of sampled taxa</b> |
|-----------------|--------------------|-----------------------------|-------------------------------|
| Masonhalea      | 47                 | 2                           | 2                             |
| Dactylina       | 48                 | 2                           | 2                             |
| Melanelia1      | 49                 | 7                           | 2                             |
| Protousnea      | 50                 | 8                           | 2                             |
| Anzia           | 51                 | 34                          | 3                             |
| Pannoparmelia   | 52                 | 5                           | 2                             |
| Evernia         | 53                 | 10                          | 3                             |
| Bryoria         | 54                 | 51                          | 12                            |
| Alectoria       | 55                 | 9                           | 4                             |
| Bryocaulon      | 56                 | 4                           | 3                             |
| Allantoparmelia | 57                 | 3                           | 2                             |
| Usnea           | 58                 | 350                         | 19                            |
| Menegazzia      | 59                 | 70                          | 9                             |
| Coelopogon      | 60                 | 2                           | 2                             |
| Protoparmelia   | 61                 | 15                          | 2                             |
